# Supplementary material for: Understanding reasons for non-adherence to active surveillance for low-intermediate risk prostate cancer
Source: PubMed Central journal article supplement — Transl Androl Urol. 2021 Jun;10(6):2728–36. doi: 10.21037/tau-20-1254 (PMC8261438; doi:10.21037/tau-20-1254), 2021-06
Supplement: tau-10-06-2728-dss.pdf [file tau-10-06-2728-dss.pdf]

## Data Sharing Statement

|                     |                                                                                                                                                    |                                                                                   |
|---------------------|----------------------------------------------------------------------------------------------------------------------------------------------------|-----------------------------------------------------------------------------------|
| <b>Article Info</b> | <a href="http://dx.doi.org/10.21037/tau-20-1254">http://dx.doi.org/10.21037/tau-20-1254</a>                                                        |                                                                                   |
| <b>Item</b>         | <b>Question</b>                                                                                                                                    | <b>Authors' Response<br/>(place "-" if not applicable)</b>                        |
| 1                   | Would you like to share data collected for your study to others?                                                                                   | NO                                                                                |
| 2                   | If not, would you like to share the reason for your decision?                                                                                      | Participants were assured that their interviews would remain private confidential |
| 3                   | What data in particular will be shared?                                                                                                            | None                                                                              |
| 4                   | Any other documents will be share? Such as study protocol, statistical analysis plan, informed consent form, clinical study report, analytic code. | Not applicable                                                                    |
| 5                   | When will data availability begin?                                                                                                                 | Not applicable                                                                    |
| 6                   | When will data availability end?                                                                                                                   | Not applicable                                                                    |
| 7                   | To whom will you share the data?                                                                                                                   | Not applicable                                                                    |
| 8                   | For what type of analysis or purpose?                                                                                                              | Not applicable                                                                    |
| 9                   | How or where can the data/documents be obtained?                                                                                                   | Not applicable                                                                    |
| 10                  | Any other restrictions?                                                                                                                            | Not applicable                                                                    |
